# Supplementary material
Source: Springer Nature journal article supplement (https://www.springermedizin.de/resource/supplementary/12902_2013_209_MOESM4_ESM.pdf/9515762)

**a**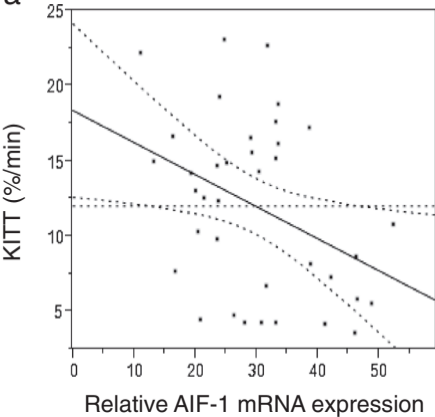**b**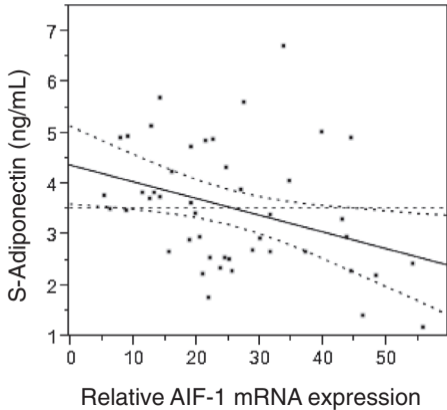

Supplement: MOESM4 [file 9515762]
